# Supplementary material
Source: PubMed Central journal article supplement (PMC3070914)

Figure S1

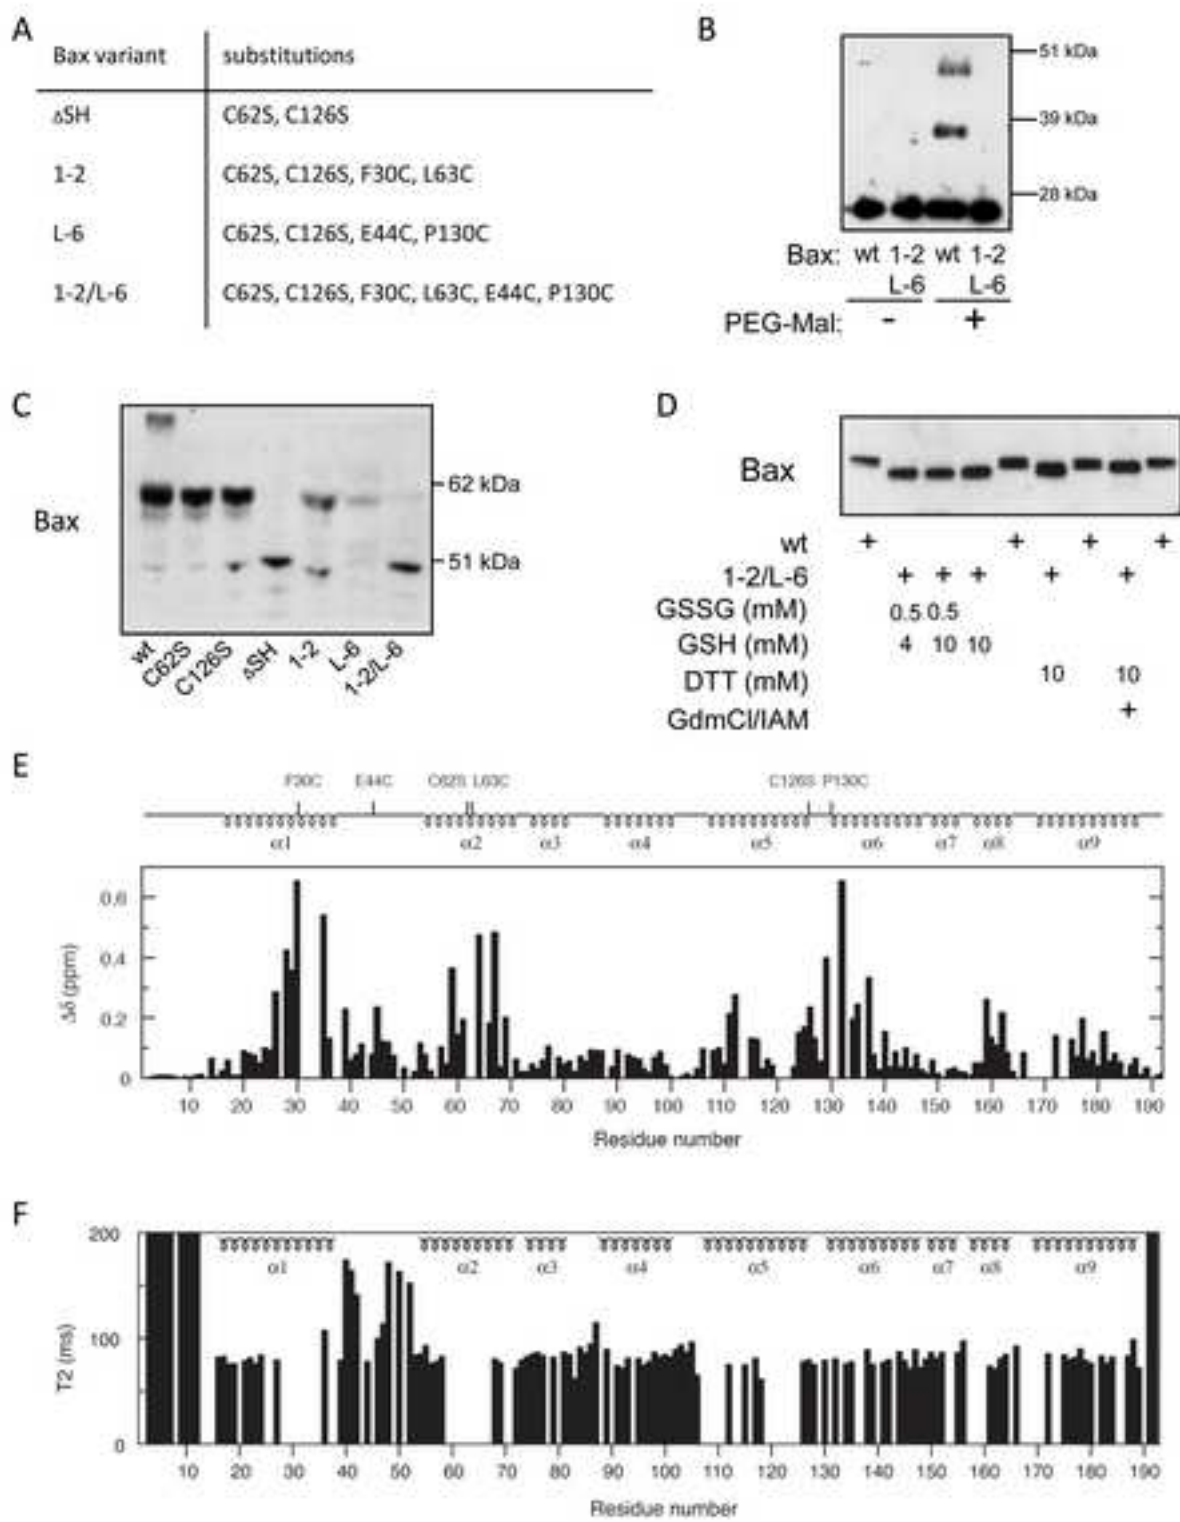

Figure S2

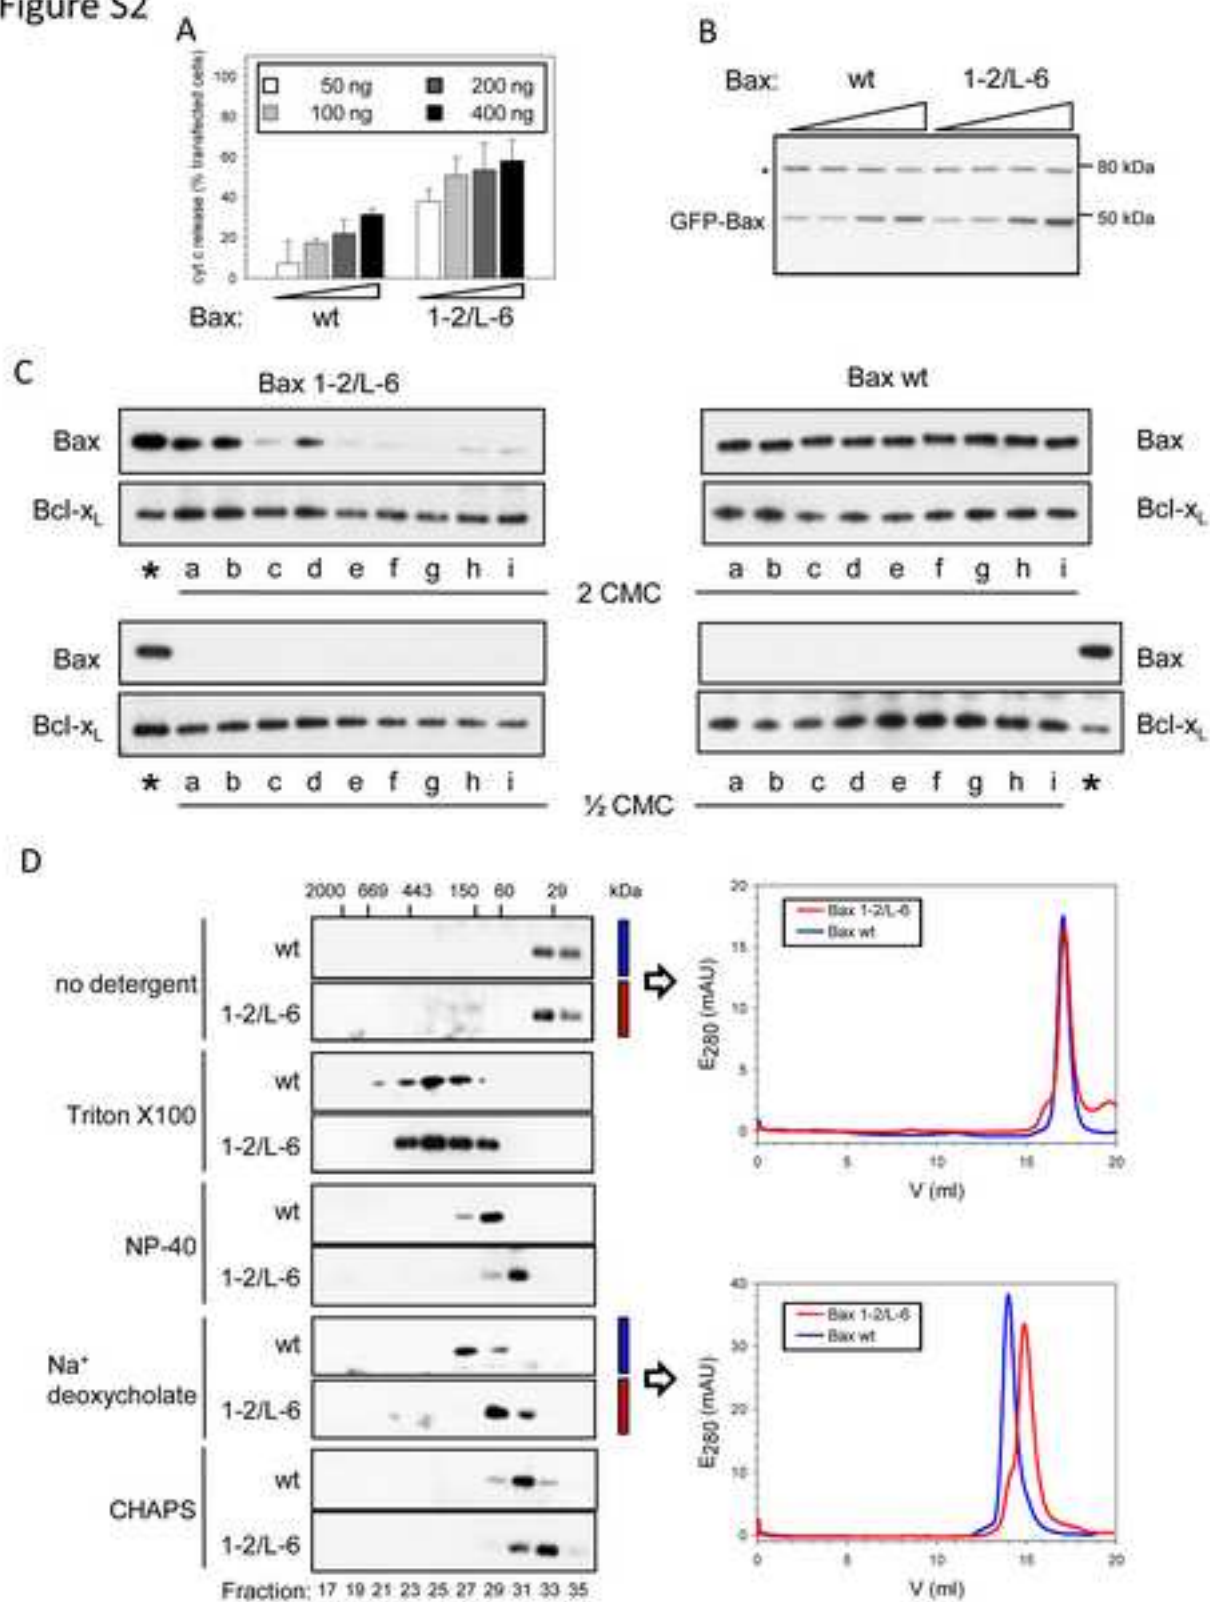

Figure S3

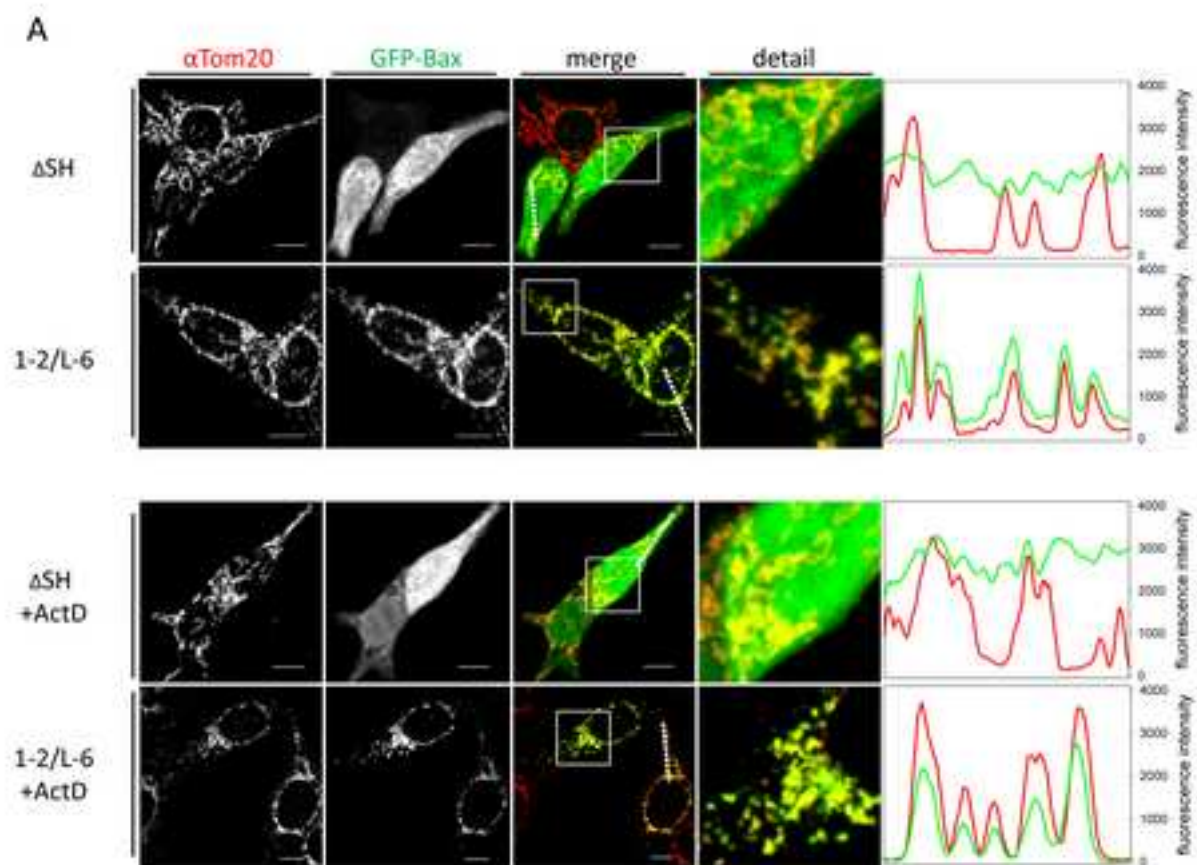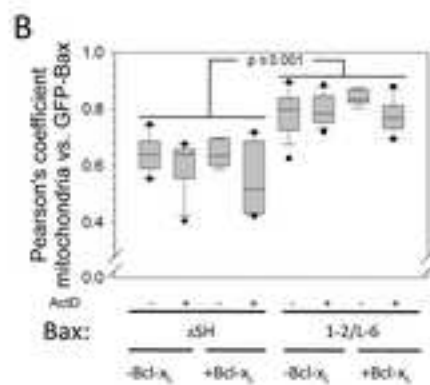

Figure S4

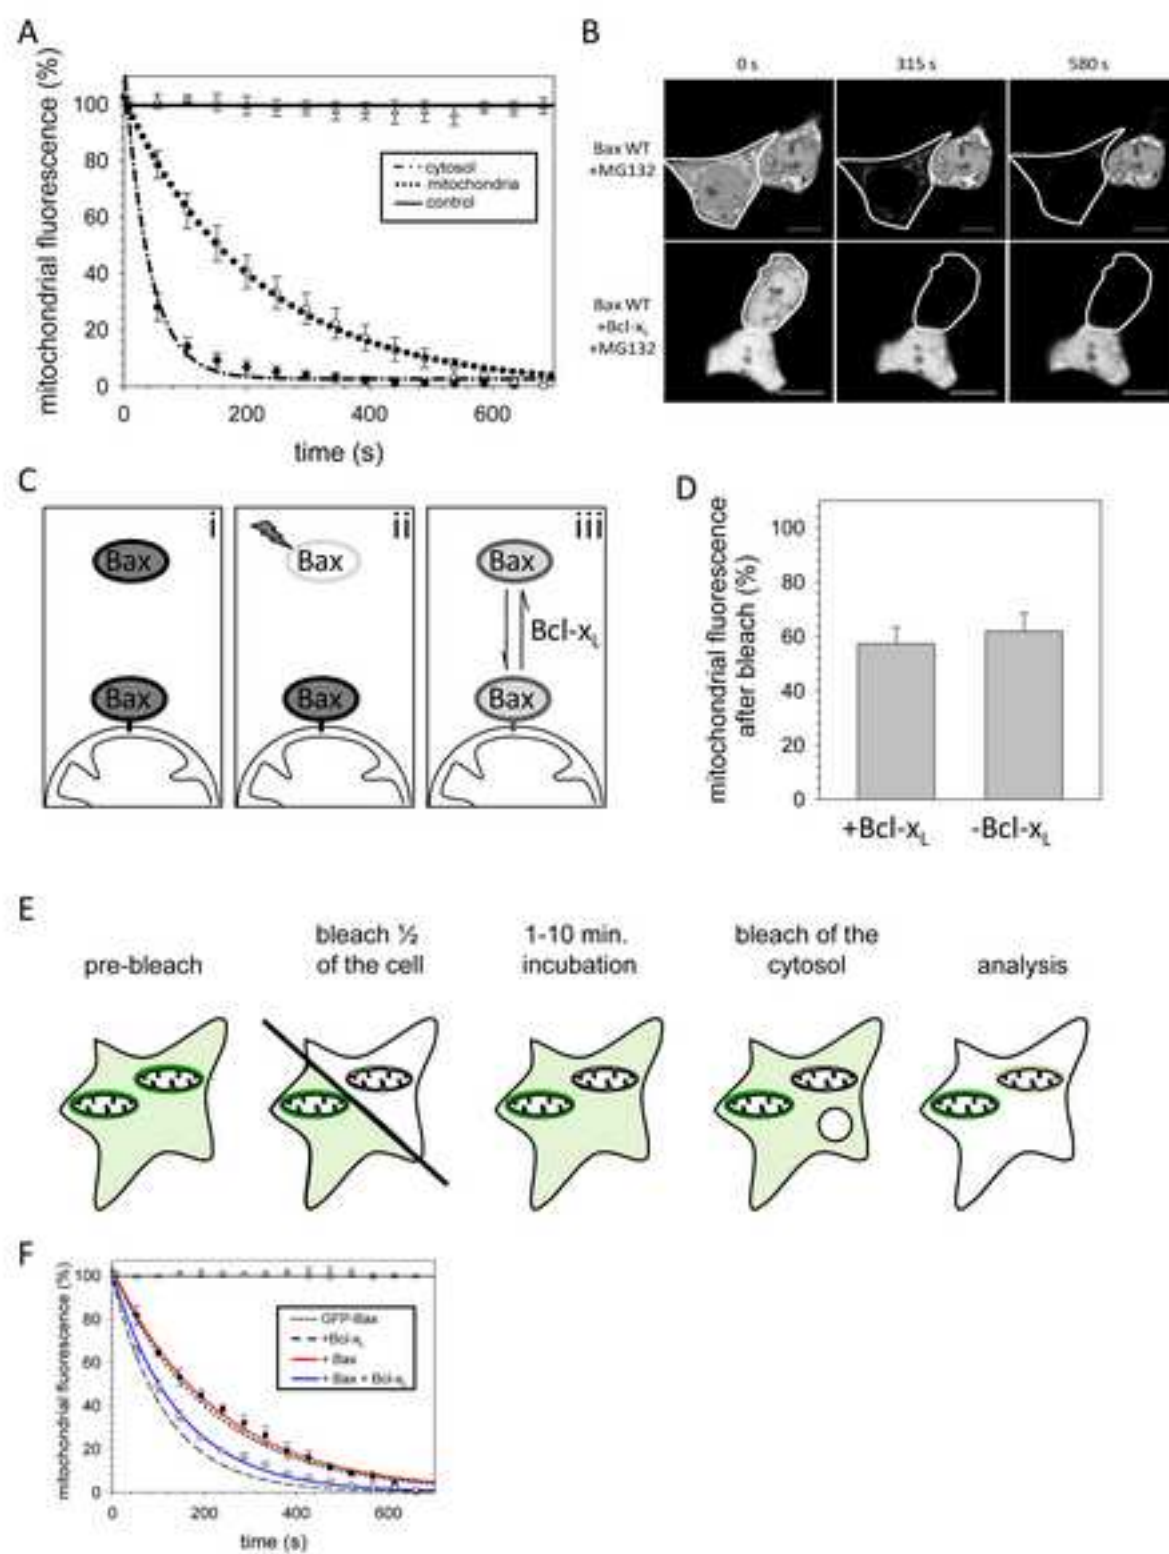

Figure S5

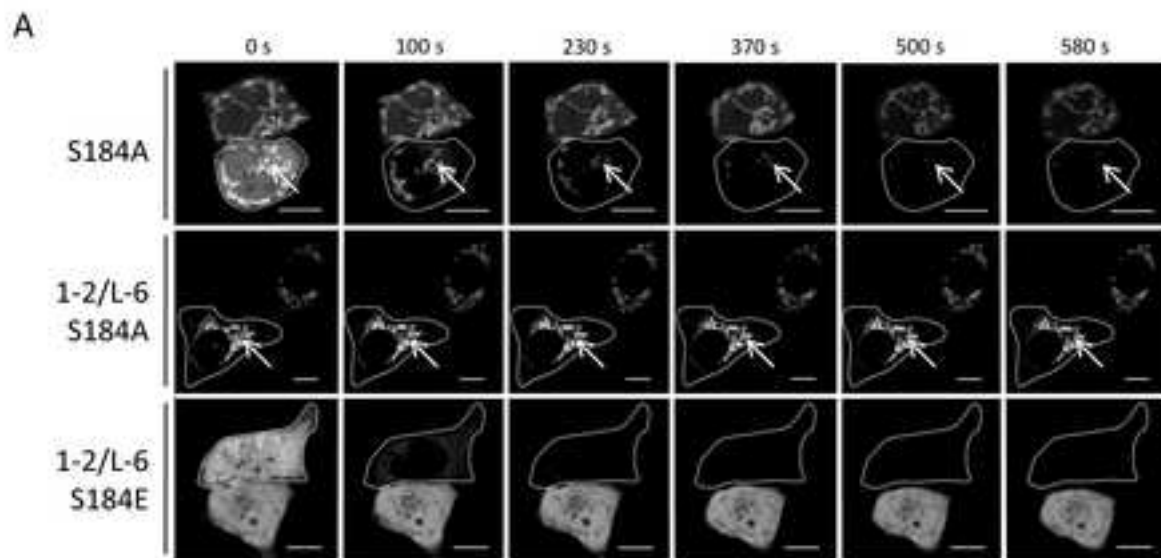

**B**

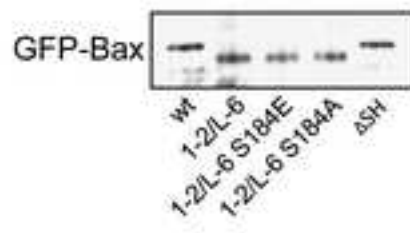

Figure S6

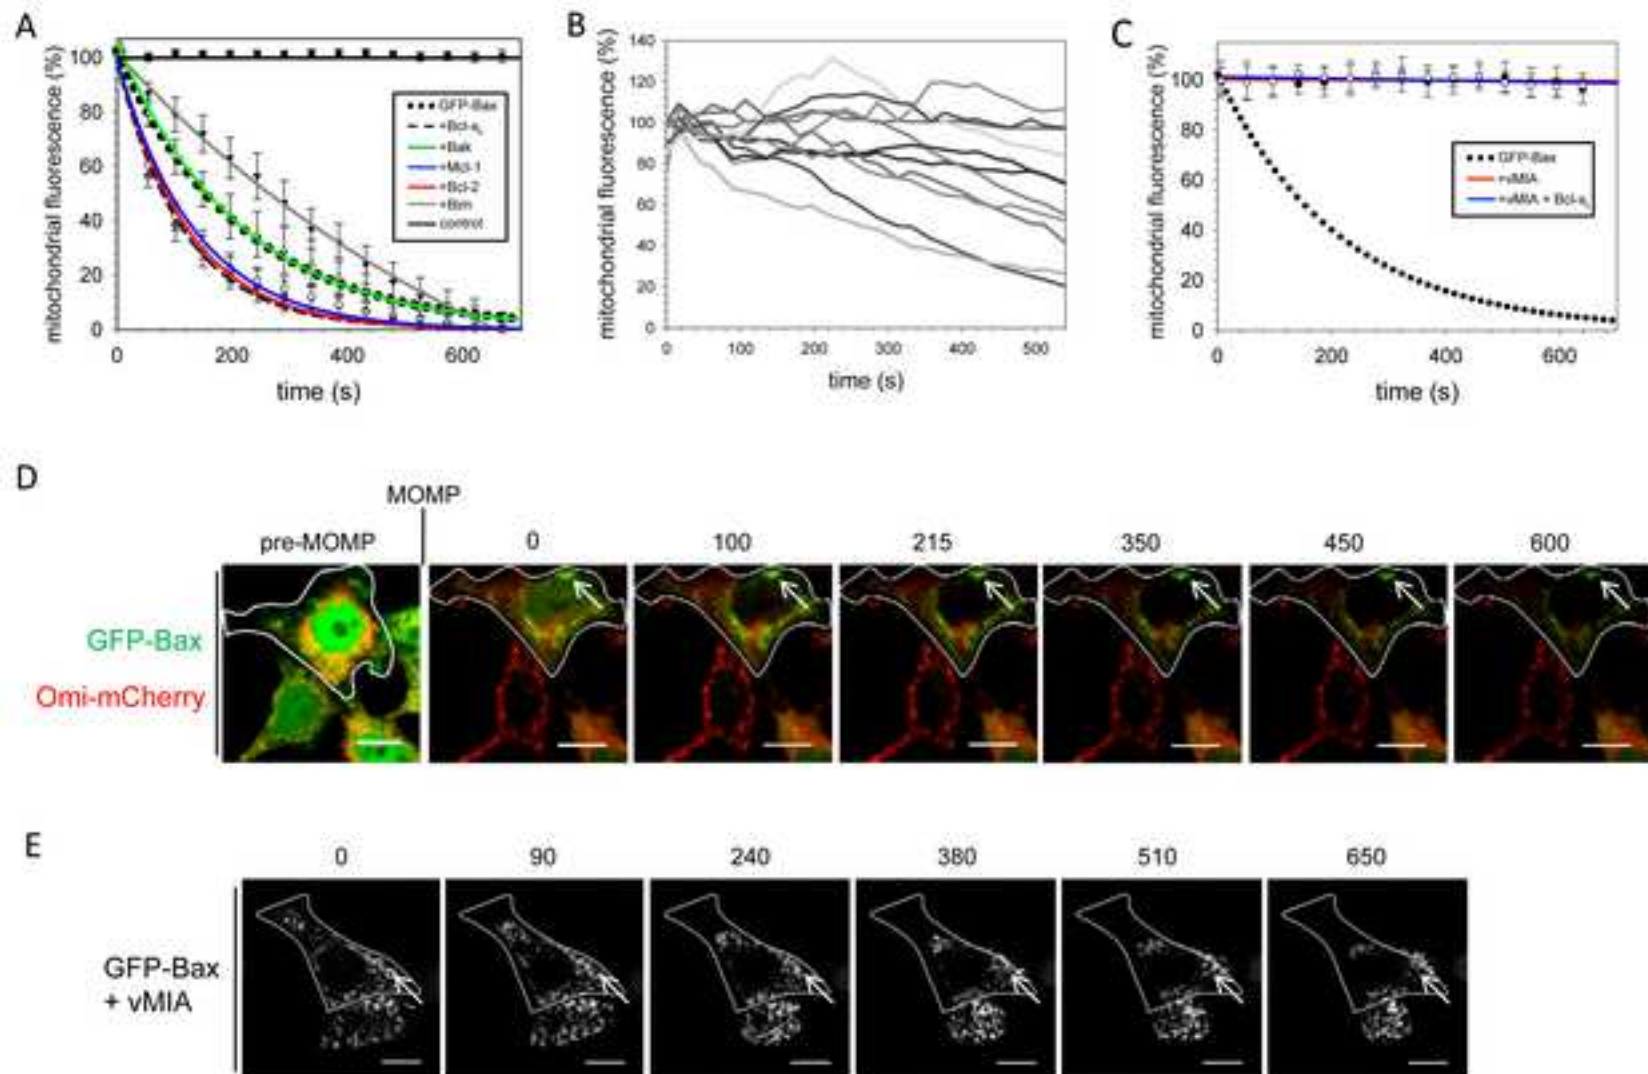



Figure S7

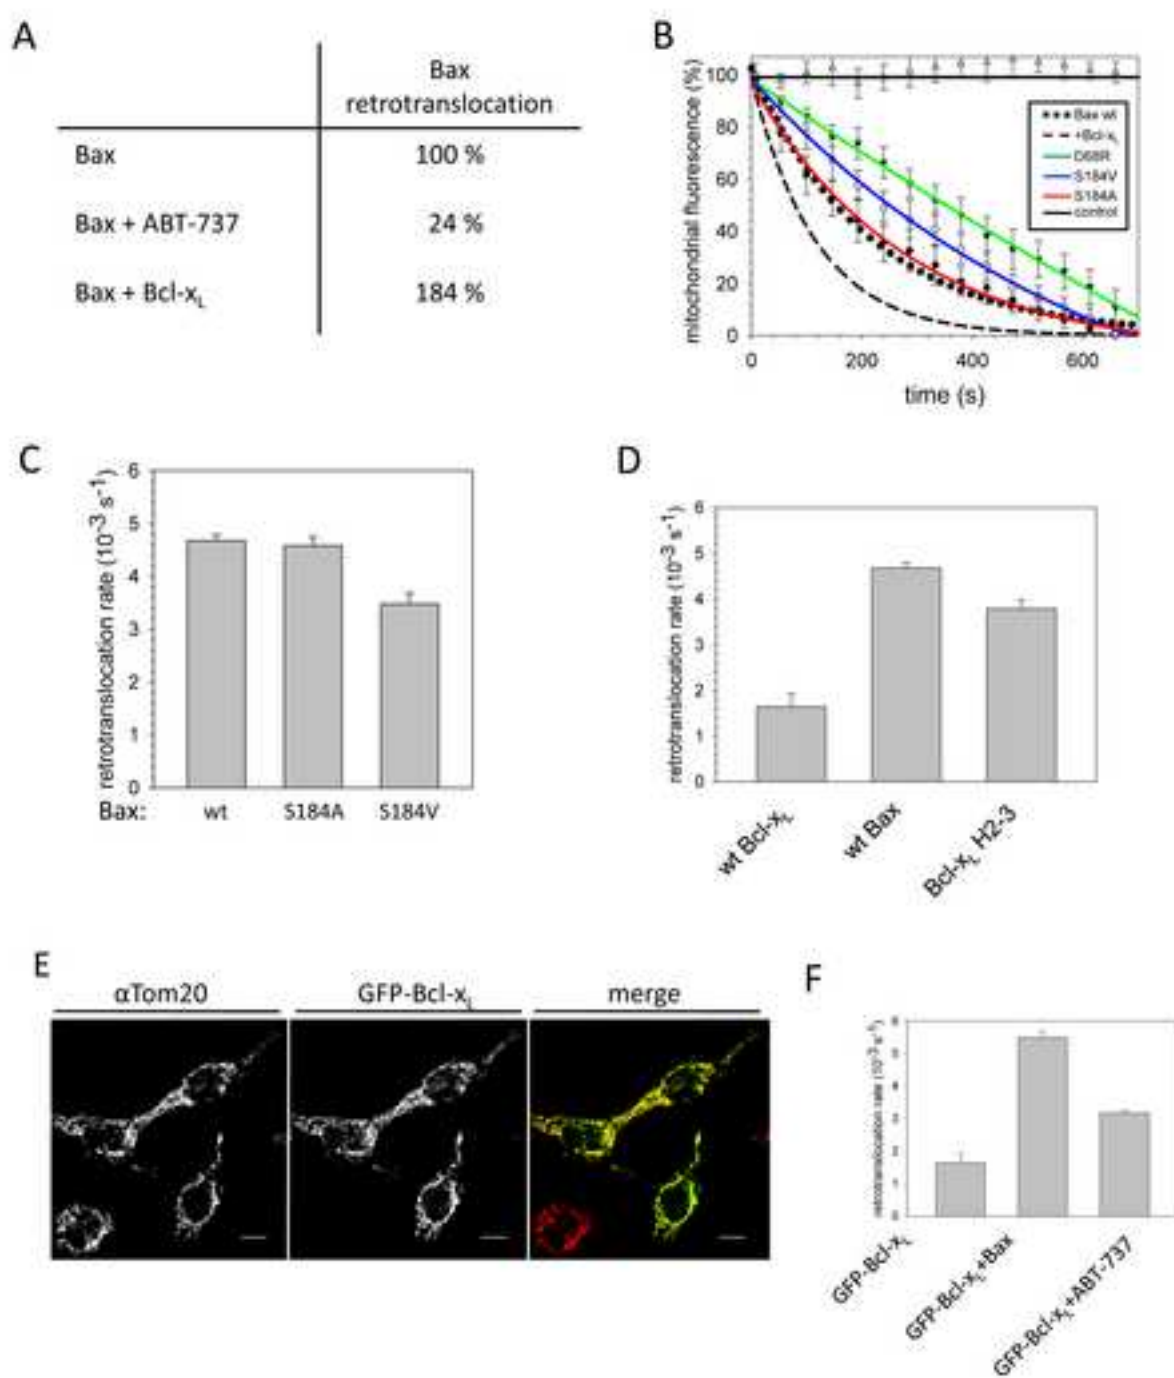

Supplement: NIHMS276850-supplement-03.pdf [file NIHMS276850-supplement-03.pdf]
